# Supplementary material for: Two-dimensional bilayer blue phosphorus Dirac-like material: a multi-orbital tight-binding investigation
Source: Royal Society of Chemistry journal article supplement (doi:10.1039/d4cp01988a), 2024-01-01
Supplement: d4cp01988a1.pdf [file d4cp01988a1.pdf]

## Two-dimensional bilayer blue phosphorus Dirac-like material: A multi-orbital tight-binding investigation

Amine Benhajj,<sup>1,\*</sup> Omar Mounkachi,<sup>1,2,\*</sup>

<sup>1</sup> *Laboratory of Condensed Matter and Interdisciplinary Sciences (LaMCScI), Faculty of Sciences, Mohammed V University of Rabat, BP 1014, RP Rabat, Morocco*

<sup>2</sup> *College of Computing, Mohammed VI Polytechnic University, Lot 660, Hay Moulay Rachid, Ben Guerir, 43150, Morocco*

### Corresponding Authors

\* amine\_benhajj@um5.ac.ma

\* omar.mounkachi@um5.ac.ma

### Electronic dispersion derivation in the presence of various neighbors within the MOTB model.

In this section, we provide slightly additional details of the derivations of dispersion relations in the presence of various NN within the MOTB model. With regard to the  $B_0$  central atom, the lattice displacement vectors of the first ( $A_{1j}$ ,  $j = 1-3$ ), second ( $B_{2j}$ ,  $j = 1-6$ ), third ( $A_{3j}$ ,  $j = 1-3$ ), fourth ( $A_{4j}$ ,  $j = 1-6$ ), and fifth nearest-neighbors ( $B_{5j}$ ,  $j = 1-6$ ) are defined respectively as:

$$\vec{d}_{1j} = \tau_{A_{1j}} - \tau_{B_0}, \vec{d}_{2j} = \tau_{B_{2j}} - \tau_{B_0}, \vec{d}_{3j} = \tau_{A_{3j}} - \tau_{B_0}, \vec{d}_{4j} = \tau_{A_{4j}} - \tau_{B_0}, \vec{d}_{5j} = \tau_{B_{5j}} - \tau_{B_0}.$$

Where  $\tau$  is the atomic position ( $A_{ij}$  an atom in sublattice  $A$  at a given site). In the case of monolayer and within the NN interaction MOTB approximation, the different coupling matrix elements hopping integrals are presented:

$$\varepsilon_s = \int \phi_s^*(\vec{r} - \vec{\tau}_{B_0}) H \phi_s(\vec{r} - \vec{\tau}_{B_0}) d^3r = \langle \phi_{s,B_0} | H | \phi_{s,B_0} \rangle, \quad (\text{A.1})$$

$$\varepsilon_p = \int \phi_p^*(\vec{r} - \vec{\tau}_{B_0}) H \phi_p(\vec{r} - \vec{\tau}_{B_0}) d^3r = \langle \phi_{p,B_0} | H | \phi_{p,B_0} \rangle, \quad (\text{A.2})$$

$$V_{ss\sigma} = \int \phi_s^*(\vec{r} - \vec{\tau}_{B_0}) H \phi_s(\vec{r} - \vec{\tau}_{A_{1j}}) d^3r = \langle \phi_{s,B_0} | H | \phi_{s,A_{1j}} \rangle, \quad (\text{A.3})$$

$$V_{sp\sigma} = \int \phi_s^*(\vec{r} - \vec{\tau}_{B_0}) H \phi_p(\vec{r} - \vec{\tau}_{A_{1j}}) d^3r = \langle \phi_{s,B_0} | H | \phi_{p,A_{1j}} \rangle, \quad (\text{A.4})$$

$$V_{pp\sigma} = \int \phi_p^*(\vec{r} - \vec{\tau}_{B_0}) H \phi_p(\vec{r} - \vec{\tau}_{A_{1j}}) d^3r = \langle \phi_{p,B_0} | H | \phi_{p,A_{1j}} \rangle, \quad (\text{A.5})$$

$$V_{pp\pi} = \int \phi_p^*(\vec{r} - \vec{\tau}_{B_0}) H \phi_p(\vec{r} - \vec{\tau}_{A_{1j}}) d^3r = \langle \phi_{p,B_0} | H | \phi_{p,A_{1j}} \rangle, \quad (\text{A.6})$$

$$S_{ss} = \int \phi_s^*(\vec{r} - \vec{\tau}_{B_0}) \phi_s(\vec{r} - \vec{\tau}_{B_0}) d^3r = \langle \phi_{s,B_0} | \phi_{s,B_0} \rangle = 1, \quad (\text{A.7})$$

$$S_{ss} = \int \phi_s^*(\vec{r} - \vec{\tau}_{B_0}) \phi_s(\vec{r} - \vec{\tau}_{A_{1j}}) d^3r = \langle \phi_{s,B_0} | \phi_{s,A_{1j}} \rangle = 0, \quad (\text{A.8})$$

$$\begin{aligned} \Psi_{\vec{k}}(\vec{r}) &= c_{s,m}(\vec{k}) \psi_{s,m,\vec{k}}(\vec{r}) + c_{x,m}(\vec{k}) \psi_{x,m,\vec{k}}(\vec{r}) + c_{y,m}(\vec{k}) \psi_{y,m,\vec{k}}(\vec{r}) + c_{z,m}(\vec{k}) \psi_{z,m,\vec{k}}(\vec{r}) \\ &= 1/\sqrt{N} \left[ e^{i\vec{k}\vec{\tau}_{B_0}} (c_{s,B_0} \phi_s(\vec{r} - \vec{\tau}_{B_0}) + c_{x,B_0} \phi_x(\vec{r} - \vec{\tau}_{B_0}) + c_{y,B_0} \phi_y(\vec{r} - \vec{\tau}_{B_0}) + c_{z,B_0} \phi_z(\vec{r} - \vec{\tau}_{B_0})) \right] \end{aligned} \quad (\text{A.9})$$

$$\langle \Psi_{\vec{k}}(\vec{r}) | H | \Psi_{\vec{k}}(\vec{r}) \rangle = E \langle \Psi_{\vec{k}}(\vec{r}) | \Psi_{\vec{k}}(\vec{r}) \rangle, \quad (\text{A.10})$$

The r.h.s of the equation (A.10):

$$\begin{aligned} & \int \left( 1/\sqrt{N} \sum_r e^{-i\vec{k}\vec{R}_r} \left[ e^{-i\vec{k}\vec{\tau}_{B_0}} (\phi_s^*(\vec{r} - \vec{\tau}_{B_0})) \right] \right) H \left( 1/\sqrt{N} \sum_u e^{i\vec{k}\vec{R}_u} \left[ e^{i\vec{k}\vec{\tau}_{B_0}} (c_{s,B_0} \phi_s(\vec{r} - \vec{\tau}_{B_0}) \right. \right. \\ & \left. \left. + c_{x,B_0} \phi_x(\vec{r} - \vec{\tau}_{B_0}) + c_{y,B_0} \phi_y(\vec{r} - \vec{\tau}_{B_0}) + c_{z,B_0} \phi_z(\vec{r} - \vec{\tau}_{B_0})) \right] \right) d^3r \\ &= \int 1/N \sum_r \sum_u e^{i\vec{k}(\vec{R}_u - \vec{R}_r)} \left[ e^{-i\vec{k}\vec{\tau}_{B_0}} (\phi_s^*(\vec{r} - \vec{\tau}_{B_0})) \right] H \Psi_{\vec{k}}(\vec{r}) d^3r, \end{aligned} \quad (\text{A.11})$$

The l.h.s of the equation (A.10):



$$M_4 = \begin{pmatrix} E_{ss}^{(41)} g_{s4} & E_{xx}^{(41)} g_{4142}^- + E_{xx}^{(43)} g_{4344}^- + E_{xx}^{(45)} g_{4546}^- & E_{xy}^{(41)} g_{4142}^+ + E_{xy}^{(43)} g_{4344}^+ + E_{xy}^{(45)} g_{4546}^+ & E_{yz}^{(41)} g_{s4} \\ -E_{sx}^{(41)} g_{4142}^- - E_{sx}^{(43)} g_{4344}^- - E_{sx}^{(45)} g_{4546}^- & E_{xx}^{(41)} g_{4142}^+ + E_{xx}^{(43)} g_{4344}^+ + E_{xx}^{(45)} g_{4546}^+ & E_{xy}^{(41)} g_{4142}^- + E_{xy}^{(43)} g_{4344}^- + E_{xy}^{(45)} g_{4546}^- & E_{yz}^{(41)} g_{4142}^- + E_{yz}^{(43)} g_{4344}^- + E_{yz}^{(45)} g_{4546}^- \\ -E_{sy}^{(41)} g_{4142}^- - E_{sy}^{(43)} g_{4344}^- - E_{sy}^{(45)} g_{4546}^- & E_{xy}^{(41)} g_{4142}^+ + E_{xy}^{(43)} g_{4344}^+ + E_{xy}^{(45)} g_{4546}^+ & E_{yy}^{(41)} g_{4142}^- + E_{yy}^{(43)} g_{4344}^- + E_{yy}^{(45)} g_{4546}^- & E_{yz}^{(41)} g_{4142}^+ + E_{yz}^{(43)} g_{4344}^+ + E_{yz}^{(45)} g_{4546}^+ \\ -E_{sz}^{(41)} g_{s4} & E_{xz}^{(41)} g_{4142}^- + E_{xz}^{(43)} g_{4344}^- + E_{xz}^{(45)} g_{4546}^- & E_{yz}^{(41)} g_{4142}^+ + E_{yz}^{(43)} g_{4344}^+ + E_{yz}^{(45)} g_{4546}^+ & E_{zz}^{(41)} g_{s4} \end{pmatrix} \quad (\text{A.21})$$

$$g_{4142}^\pm = \exp(i\vec{k}d_{41}^\pm) \pm \exp(i\vec{k}d_{42}^\pm), g_{4344}^\pm = \exp(i\vec{k}d_{43}^\pm) \pm \exp(i\vec{k}d_{44}^\pm), g_{4546}^\pm = \exp(i\vec{k}d_{45}^\pm) \pm \exp(i\vec{k}d_{46}^\pm) - \exp(i\vec{k}d_{45}^\pm), g_{s4} = \sum_{j=1}^6 \exp(i\vec{k}d_{4j}^\pm), \quad (\text{A.22})$$

$$M_5 = \begin{pmatrix} E_{ss}^{(51)} g_{s5} & E_{sx}^{(52)} g_{5256}^- & E_{sy}^{(51)} g_{5155}^- + E_{sy}^{(52)} g_{5256}^- & 0 \\ -E_{sx}^{(52)} g_{5256}^- & E_{xx}^{(51)} g_{5155}^+ + E_{xx}^{(52)} g_{5256}^+ & E_{xy}^{(52)} g_{5256}^- & 0 \\ -E_{sy}^{(51)} g_{5155}^- - E_{sy}^{(52)} g_{5256}^- & E_{xy}^{(52)} g_{5256}^- & E_{yy}^{(51)} g_{5155}^+ + E_{yy}^{(52)} g_{5256}^+ & 0 \\ 0 & 0 & 0 & E_{zz}^{(51)} g_{s5} \end{pmatrix}, \quad (\text{A.23})$$

$$g_{5256}^- = \exp(i\vec{k}d_{52}^-) + \exp(i\vec{k}d_{53}^-) - \exp(i\vec{k}d_{54}^-) - \exp(i\vec{k}d_{56}^-), g_{5155}^\pm = \exp(i\vec{k}d_{51}^\pm) \pm \exp(i\vec{k}d_{56}^\pm), g_{5256}^+ = \exp(i\vec{k}d_{52}^+) + \exp(i\vec{k}d_{53}^+) + \exp(i\vec{k}d_{54}^+) + \exp(i\vec{k}d_{56}^+), g_{5256}^- = \exp(i\vec{k}d_{52}^-) - \sum_{j=1}^6 \exp(i\vec{k}d_{5j}^-), \quad (\text{A.24})$$

$$M_{zeros} = \begin{pmatrix} 0 & 0 & 0 & 0 \\ 0 & 0 & 0 & 0 \\ 0 & 0 & 0 & 0 \\ 0 & 0 & 0 & 0 \end{pmatrix}, \quad (\text{A.25})$$

$$M_{2'} = \begin{pmatrix} E_{ss}^{(11')} & 0 & 0 & E_{sz}^{(11')} \\ 0 & E_{xx}^{(11')} & 0 & 0 \\ 0 & 0 & E_{yy}^{(11')} & 0 \\ -E_{sz}^{(11')} & 0 & 0 & E_{zz}^{(11')} \end{pmatrix}, \quad (\text{A.26})$$

$$M_{3'} = \begin{pmatrix} E_{ss}^{(11')} g_{s1'} & E_{sx}^{(13')} g_{1312}'^- & E_{sy}^{(11')} g_{11'}^+ + E_{sy}^{(13')} g_{1312}'^+ & E_{sz}^{(11')} g_{s1'} \\ -E_{sx}^{(13')} g_{1312}'^- & E_{xx}^{(11')} g_{11'}^+ + E_{xx}^{(13')} g_{1312}'^+ & E_{xy}^{(12')} g_{1213}'^- & E_{xz}^{(13')} g_{1312}'^- \\ -E_{sy}^{(11')} g_{11'}^+ - E_{sy}^{(13')} g_{1312}'^+ & E_{xy}^{(12')} g_{1213}'^- & E_{yy}^{(11')} g_{11'}^+ + E_{yy}^{(13')} g_{1312}'^+ & E_{yz}^{(11')} g_{11'}^+ + E_{yz}^{(13')} g_{1312}'^+ \\ -E_{sz}^{(11')} g_{s1'} & E_{xz}^{(13')} g_{1312}'^- & E_{yz}^{(11')} g_{11'}^+ + E_{yz}^{(13')} g_{1312}'^+ & E_{zz}^{(11')} g_{s1'} \end{pmatrix}, \quad (\text{A.27})$$

$$g_{s1'} = \sum_{j=1}^3 \exp(i\vec{k}d_{1j}')^+, g_{1312}'^\pm = \exp(i\vec{k}d_{13}')^\pm \pm \exp(i\vec{k}d_{12}')^\pm, g_{1213}'^- = \exp(i\vec{k}d_{12}')^- - \exp(i\vec{k}d_{13}')^-, \quad (\text{A.28})$$

$$M_{5'} = \begin{pmatrix} E_{ss}^{(21')} & 0 & 0 & E_{sz}^{(21')} \\ 0 & E_{xx}^{(21')} & 0 & 0 \\ 0 & 0 & E_{yy}^{(21')} & 0 \\ -E_{sz}^{(21')} & 0 & 0 & E_{zz}^{(21')} \end{pmatrix}, \quad (\text{A.29})$$

AA stacking within the 5NN in- and 2NN out-of-plane coupling MOTB approach (A.25)–(A.29).

TABLE I. Structural parameters of the strained AA stacked bilayer buk-P.

|                         | $a$ (Å) | $\Delta_{int}$ (Å) | $h_{BA}$ (Å) | $b$ (Å) | $E_g$ (meV) |
|-------------------------|---------|--------------------|--------------|---------|-------------|
|                         | 4.70    | 2.14               | 0            | 2.7     | 400         |
|                         | 4.60    | 2.24               | 0            | 2.66    | 310         |
| AA stacked bilayer form | 4.34    | 2.07               | 0.16         | 2.51    | 280         |
|                         | 4.26    | 2.09               | 0.10         | 2.46    | 280         |
|                         | 4.20    | 2.20               | 0            | 2.42    | 270         |
|                         | 4.00    | 2.602              | 0.045        | 2.31    | 1           |

Matlab code of the monolayer buk-P within the 5NN intralayer coupling MOTB model:

```

%-----Programmed by: BENHAIJ Amine-----%
%-----%
%-----About-----%
% It calculates the energy band structure of monolayer blue
% Phosphorene using a (MOTB) approach including up to the fifth
% nearest neighbor in-plane couplings
%-----%
clear variables;
close all;
clc;
%-----%
%-----Crystal structure and Brillouin zone-----%
a = 3.28; %Lattice constant [Angstrom]
d_vertical = 1.23; %Vertical distance between A and B [Angstrom]
%-----%
%-----Coordinates of atoms-----%
tau_B_center = [0, 0, 0];
%-----%
tau_A_1_1 = [0, a/sqrt(3), d_vertical];
tau_A_1_2 = [a/2, -a/2/sqrt(3), d_vertical];
tau_A_1_3 = [-a/2, -a/2/sqrt(3), d_vertical];
%-----%
tau_B_2_1 = [a/2, (3*a)/2/sqrt(3), 0];
tau_B_2_2 = [-a/2, (3*a)/2/sqrt(3), 0];
tau_B_2_3 = [a, 0, 0];
tau_B_2_4 = [-a, 0, 0];
tau_B_2_5 = [a/2, -(3*a)/2/sqrt(3), 0];
tau_B_2_6 = [-a/2, -(3*a)/2/sqrt(3), 0];
%-----%
tau_A_3_1 = [a, a/sqrt(3), d_vertical];
tau_A_3_2 = [-a, a/sqrt(3), d_vertical];
tau_A_3_3 = [0, -(2*a)/sqrt(3), d_vertical];
%-----%
tau_A_4_1 = [a/2, (5*a)/2/sqrt(3), d_vertical];
tau_A_4_2 = [-a/2, (5*a)/2/sqrt(3), d_vertical];
tau_A_4_3 = [(3*a)/2, -a/2/sqrt(3), d_vertical];
tau_A_4_4 = [-(3*a)/2, -a/2/sqrt(3), d_vertical];
tau_A_4_5 = [a, -(2*a)/sqrt(3), d_vertical];
tau_A_4_6 = [-a, -(2*a)/sqrt(3), d_vertical];
%-----%
tau_B_5_1 = [0, (3*a)/sqrt(3), 0];
tau_B_5_2 = [(3*a)/2, (3*a)/2/sqrt(3), 0];
tau_B_5_3 = [-(3*a)/2, (3*a)/2/sqrt(3), 0];
tau_B_5_4 = [(3*a)/2, -(3*a)/2/sqrt(3), 0];
tau_B_5_5 = [0, -(3*a)/sqrt(3), 0];
tau_B_5_6 = [-(3*a)/2, -(3*a)/2/sqrt(3), 0];
%-----%
%-----Brillouin zone High symmetry points of k-space-----%
gamma = [0, 0];
K = [(2 * pi)/(3 * a), (2 * pi)/(sqrt(3) * a)];
M = [0, (2 * pi)/(sqrt(3) * a)]; %#ok< *NASGU>
%-----%
%-----Lattice displacement vectors-----%
d_1 = tau_A_1_1 - tau_B_center;
x_d_1 = d_1(:,1);
y_d_1 = d_1(:,2);
z_d_1 = d_1(:,3);
d_2 = tau_A_1_3 - tau_B_center;
x_d_2 = d_2(:,1);
y_d_2 = d_2(:,2);
z_d_2 = d_2(:,3);
d_3 = tau_A_1_2 - tau_B_center;
x_d_3 = d_3(:,1);
y_d_3 = d_3(:,2);
z_d_3 = d_3(:,3);
distance_1 = sqrt((x_d_1)^2 + (y_d_1)^2 + (z_d_1)^2); %Distance between atom
A and B [Angstrom]
%-----%
d_4 = tau_B_2_1 - tau_B_center;
x_d_4 = d_4(:,1);
y_d_4 = d_4(:,2);
z_d_4 = d_4(:,3);
d_5 = tau_B_2_2 - tau_B_center;
x_d_5 = d_5(:,1);
y_d_5 = d_5(:,2);
z_d_5 = d_5(:,3);
d_6 = tau_B_2_3 - tau_B_center;
x_d_6 = d_6(:,1);
y_d_6 = d_6(:,2);
z_d_6 = d_6(:,3);
d_7 = tau_B_2_4 - tau_B_center;
x_d_7 = d_7(:,1);
y_d_7 = d_7(:,2);
z_d_7 = d_7(:,3);
d_8 = tau_B_2_5 - tau_B_center;
x_d_8 = d_8(:,1);
y_d_8 = d_8(:,2);
z_d_8 = d_8(:,3);
d_9 = tau_B_2_6 - tau_B_center;
x_d_9 = d_9(:,1);
y_d_9 = d_9(:,2);
z_d_9 = d_9(:,3);
distance_2 = sqrt((x_d_4)^2 + (y_d_4)^2 + (z_d_4)^2); %Distance between atom
B and B [Angstrom]
%-----%
d_10 = tau_A_3_1 - tau_B_center;
x_d_10 = d_10(:,1);
y_d_10 = d_10(:,2);
z_d_10 = d_10(:,3);
d_11 = tau_A_3_2 - tau_B_center;
x_d_11 = d_11(:,1);
y_d_11 = d_11(:,2);
z_d_11 = d_11(:,3);
d_12 = tau_A_3_3 - tau_B_center;
x_d_12 = d_12(:,1);
y_d_12 = d_12(:,2);
z_d_12 = d_12(:,3);
distance_3 = sqrt((x_d_10)^2 + (y_d_10)^2 + (z_d_10)^2); %Distance between
atom B and A 3rd (nn) [Angstrom]
%-----%
d_13 = tau_A_4_1 - tau_B_center;
x_d_13 = d_13(:,1);
y_d_13 = d_13(:,2);
z_d_13 = d_13(:,3);
d_14 = tau_A_4_2 - tau_B_center;
x_d_14 = d_14(:,1);
y_d_14 = d_14(:,2);
z_d_14 = d_14(:,3);
d_15 = tau_A_4_3 - tau_B_center;
x_d_15 = d_15(:,1);
y_d_15 = d_15(:,2);
z_d_15 = d_15(:,3);
d_16 = tau_A_4_4 - tau_B_center;
x_d_16 = d_16(:,1);
y_d_16 = d_16(:,2);
z_d_16 = d_16(:,3);
d_17 = tau_A_4_5 - tau_B_center;
x_d_17 = d_17(:,1);
y_d_17 = d_17(:,2);
z_d_17 = d_17(:,3);
d_18 = tau_A_4_6 - tau_B_center;
x_d_18 = d_18(:,1);
y_d_18 = d_18(:,2);
z_d_18 = d_18(:,3);
distance_4 = sqrt((x_d_13)^2 + (y_d_13)^2 + (z_d_13)^2); %Distance between
atom B and A 4th (nn) [Angstrom]
%-----%
d_19 = tau_B_5_1 - tau_B_center;
x_d_19 = d_19(:,1);
y_d_19 = d_19(:,2);
z_d_19 = d_19(:,3);
d_20 = tau_B_5_2 - tau_B_center;
x_d_20 = d_20(:,1);

```

```

y_d_20 = d_20(:,2);
z_d_20 = d_20(:,3);

d_21 = tau_B_5_3 - tau_B_center;
x_d_21 = d_21(:,1);
y_d_21 = d_21(:,2);
z_d_21 = d_21(:,3);

d_22 = tau_B_5_4 - tau_B_center;
x_d_22 = d_22(:,1);
y_d_22 = d_22(:,2);
z_d_22 = d_22(:,3);

d_23 = tau_B_5_5 - tau_B_center;
x_d_23 = d_23(:,1);
y_d_23 = d_23(:,2);
z_d_23 = d_23(:,3);

d_24 = tau_B_5_6 - tau_B_center;
x_d_24 = d_24(:,1);
y_d_24 = d_24(:,2);
z_d_24 = d_24(:,3);

distance_5 = sqrt((x_d_19)^2 + (y_d_19)^2 + (z_d_19)^2); %Distance between
atom B and B 5th (nn) |Angstrom]
%-----%

%-----Hamiltonian SK parameters-----%

%-----All the SK parameters are in eV-----%
Epsilon_s = -8.55;
Epsilon_p_x = -4.0;
Epsilon_p_y = -4.0;
Epsilon_p_z = -4.0;
%-----%

V_s_sigma_1 = -1.0;
V_s_p_sigma_1 = -2.90;
V_p_p_sigma_1 = 3.30;
V_p_p_pi_1 = -0.70;

V_s_sigma_2 = -1.0;
V_s_p_sigma_2 = -2.90;
V_p_p_sigma_2 = 3.30;
V_p_p_pi_2 = -0.70;

V_s_sigma_3 = -1.0;
V_s_p_sigma_3 = -2.90;
V_p_p_sigma_3 = 3.30;
V_p_p_pi_3 = -0.70;
%-----%

decay_r_2 = 1;

V_s_sigma_4 = 0.25 * decay_r_2;
V_s_p_sigma_4 = -0.30 * decay_r_2;
V_p_p_sigma_4 = 1.15 * decay_r_2;
V_p_p_pi_4 = -0.40 * decay_r_2;

V_s_sigma_5 = V_s_sigma_4 * decay_r_2;
V_s_p_sigma_5 = V_s_p_sigma_4 * decay_r_2;
V_p_p_sigma_5 = V_p_p_sigma_4 * decay_r_2;
V_p_p_pi_5 = V_p_p_pi_4 * decay_r_2;

V_s_sigma_6 = V_s_sigma_4 * decay_r_2;
V_s_p_sigma_6 = V_s_p_sigma_4 * decay_r_2;
V_p_p_sigma_6 = V_p_p_sigma_4 * decay_r_2;
V_p_p_pi_6 = V_p_p_pi_4 * decay_r_2;

V_s_sigma_7 = V_s_sigma_4 * decay_r_2;
V_s_p_sigma_7 = V_s_p_sigma_4 * decay_r_2;
V_p_p_sigma_7 = V_p_p_sigma_4 * decay_r_2;
V_p_p_pi_7 = V_p_p_pi_4 * decay_r_2;

V_s_sigma_8 = V_s_sigma_4 * decay_r_2;
V_s_p_sigma_8 = V_s_p_sigma_4 * decay_r_2;
V_p_p_sigma_8 = V_p_p_sigma_4 * decay_r_2;
V_p_p_pi_8 = V_p_p_pi_4 * decay_r_2;

V_s_sigma_9 = V_s_sigma_4 * decay_r_2;
V_s_p_sigma_9 = V_s_p_sigma_4 * decay_r_2;
V_p_p_sigma_9 = V_p_p_sigma_4 * decay_r_2;
V_p_p_pi_9 = V_p_p_pi_4 * decay_r_2;
%-----%

decay_r_3 = exp((distance_1 - distance_3)/((a - distance_1)/(log(10))));

V_s_sigma_10 = -1.0 * decay_r_3;
V_s_p_sigma_10 = -2.90 * decay_r_3;
V_p_p_sigma_10 = 3.30 * decay_r_3;
V_p_p_pi_10 = -0.70 * decay_r_3;

V_s_sigma_11 = -1.0 * decay_r_3;

V_s_p_sigma_11 = -2.90 * decay_r_3;
V_p_p_sigma_11 = 3.30 * decay_r_3;
V_p_p_pi_11 = -0.70 * decay_r_3;

V_s_sigma_12 = -1.0 * decay_r_3;
V_s_p_sigma_12 = -2.90 * decay_r_3;
V_p_p_sigma_12 = 3.30 * decay_r_3;
V_p_p_pi_12 = -0.70 * decay_r_3;
%-----%

decay_r_4 = exp((distance_1 - distance_4)/((a - distance_1)/(log(10))));

V_s_sigma_13 = -1.0 * decay_r_4;
V_s_p_sigma_13 = -2.90 * decay_r_4;
V_p_p_sigma_13 = 3.30 * decay_r_4;
V_p_p_pi_13 = -0.70 * decay_r_4;

V_s_sigma_14 = -1.0 * decay_r_4;
V_s_p_sigma_14 = -2.90 * decay_r_4;
V_p_p_sigma_14 = 3.30 * decay_r_4;
V_p_p_pi_14 = -0.70 * decay_r_4;

V_s_sigma_15 = -1.0 * decay_r_4;
V_s_p_sigma_15 = -2.90 * decay_r_4;
V_p_p_sigma_15 = 3.30 * decay_r_4;
V_p_p_pi_15 = -0.70 * decay_r_4;

V_s_sigma_16 = -1.0 * decay_r_4;
V_s_p_sigma_16 = -2.90 * decay_r_4;
V_p_p_sigma_16 = 3.30 * decay_r_4;
V_p_p_pi_16 = -0.70 * decay_r_4;

V_s_sigma_17 = -1.0 * decay_r_4;
V_s_p_sigma_17 = -2.90 * decay_r_4;
V_p_p_sigma_17 = 3.30 * decay_r_4;
V_p_p_pi_17 = -0.70 * decay_r_4;

V_s_sigma_18 = -1.0 * decay_r_4;
V_s_p_sigma_18 = -2.90 * decay_r_4;
V_p_p_sigma_18 = 3.30 * decay_r_4;
V_p_p_pi_18 = -0.70 * decay_r_4;
%-----%

decay_r_5 = exp((distance_1 - distance_5)/((a - distance_1)/(log(10))));

V_s_sigma_19 = -1.0 * decay_r_5;
V_s_p_sigma_19 = -2.90 * decay_r_5;
V_p_p_sigma_19 = 3.30 * decay_r_5;
V_p_p_pi_19 = -0.70 * decay_r_5;

V_s_sigma_20 = -1.0 * decay_r_5;
V_s_p_sigma_20 = -2.90 * decay_r_5;
V_p_p_sigma_20 = 3.30 * decay_r_5;
V_p_p_pi_20 = -0.70 * decay_r_5;

V_s_sigma_21 = -1.0 * decay_r_5;
V_s_p_sigma_21 = -2.90 * decay_r_5;
V_p_p_sigma_21 = 3.30 * decay_r_5;
V_p_p_pi_21 = -0.70 * decay_r_5;

V_s_sigma_22 = -1.0 * decay_r_5;
V_s_p_sigma_22 = -2.90 * decay_r_5;
V_p_p_sigma_22 = 3.30 * decay_r_5;
V_p_p_pi_22 = -0.70 * decay_r_5;

V_s_sigma_23 = -1.0 * decay_r_5;
V_s_p_sigma_23 = -2.90 * decay_r_5;
V_p_p_sigma_23 = 3.30 * decay_r_5;
V_p_p_pi_23 = -0.70 * decay_r_5;

V_s_sigma_24 = -1.0 * decay_r_5;
V_s_p_sigma_24 = -2.90 * decay_r_5;
V_p_p_sigma_24 = 3.30 * decay_r_5;
V_p_p_pi_24 = -0.70 * decay_r_5;
%-----%

E_s_1 = V_s_sigma_1;
E_s_x_1 = (x_d_1/distance_1) * V_s_p_sigma_1;
E_s_y_1 = (y_d_1/distance_1) * V_s_p_sigma_1;
E_s_z_1 = (z_d_1/distance_1) * V_s_p_sigma_1;
E_x_y_1 = ((x_d_1 * y_d_1)/(distance_1^2)) * (V_p_p_sigma_1 - V_p_p_pi_1);
E_x_z_1 = ((x_d_1 * z_d_1)/(distance_1^2)) * (V_p_p_sigma_1 - V_p_p_pi_1);
E_y_z_1 = ((y_d_1 * z_d_1)/(distance_1^2)) * (V_p_p_sigma_1 - V_p_p_pi_1);
E_x_x_1 = ((x_d_1^2)/(distance_1^2)) * V_p_p_sigma_1 + ((1 -
(x_d_1^2)/(distance_1^2)) * V_p_p_pi_1);
E_y_y_1 = ((y_d_1^2)/(distance_1^2)) * V_p_p_sigma_1 + ((1 -
(y_d_1^2)/(distance_1^2)) * V_p_p_pi_1);
E_z_z_1 = ((z_d_1^2)/(distance_1^2)) * V_p_p_sigma_1 + ((1 -
(z_d_1^2)/(distance_1^2)) * V_p_p_pi_1);

E_s_2 = V_s_sigma_2;
E_s_x_2 = (x_d_2/distance_1) * V_s_p_sigma_2;
E_s_y_2 = (y_d_2/distance_1) * V_s_p_sigma_2;

```





```

%-----Gamma-M direction-----%
k_x_1 = 0; k_y = (2 * pi)/sqrt(3)/a; k_z = 0; kmax = 1; Nt = 101;
for Nk = 1:Nt
    k = [k_x_1 k_y k_z] * kmax * (Nk - 1) / (Nt - 1);
%-----%

%-----Phase factors-----%
g_1_plus = exp(1i*sum(k.*d_1));
g_2_plus = exp(1i*sum(k.*d_2));
g_3_plus = exp(1i*sum(k.*d_3));
%-----%
g_4_plus = exp(1i*sum(k.*d_4));
g_5_plus = exp(1i*sum(k.*d_5));
g_6_plus = exp(1i*sum(k.*d_6));
g_7_plus = exp(1i*sum(k.*d_7));
g_8_plus = exp(1i*sum(k.*d_8));
g_9_plus = exp(1i*sum(k.*d_9));
%-----%
g_10_plus = exp(1i*sum(k.*d_10));
g_11_plus = exp(1i*sum(k.*d_11));
g_12_plus = exp(1i*sum(k.*d_12));
%-----%
g_13_plus = exp(1i*sum(k.*d_13));
g_14_plus = exp(1i*sum(k.*d_14));
g_15_plus = exp(1i*sum(k.*d_15));
g_16_plus = exp(1i*sum(k.*d_16));
g_17_plus = exp(1i*sum(k.*d_17));
g_18_plus = exp(1i*sum(k.*d_18));
%-----%
g_19_plus = exp(1i*sum(k.*d_19));
g_20_plus = exp(1i*sum(k.*d_20));
g_21_plus = exp(1i*sum(k.*d_21));
g_22_plus = exp(1i*sum(k.*d_22));
g_23_plus = exp(1i*sum(k.*d_23));
g_24_plus = exp(1i*sum(k.*d_24));
%-----%
g_k = g_1_plus + g_2_plus + g_3_plus;
g_k_2_3_minus = g_3_plus - g_2_plus;
g_k_2_3_plus = g_3_plus + g_2_plus;
g_k_3_2_minus = g_2_plus - g_3_plus;
%-----%
g_k_2 = g_4_plus + g_5_plus + g_6_plus + g_7_plus + g_8_plus + g_9_plus;
g_k_4_9 = g_4_plus - g_5_plus + g_8_plus - g_9_plus;
g_k_6_7_minus = g_6_plus - g_7_plus;
g_k_6_7_plus = g_6_plus + g_7_plus;
g_k_4_9_minus = g_4_plus + g_5_plus - g_8_plus - g_9_plus;
g_k_4_9_plus = g_4_plus + g_5_plus + g_8_plus + g_9_plus;
g_k_4_9_minus_1 = g_4_plus - g_5_plus - g_8_plus + g_9_plus;
%-----%
g_k_3 = g_10_plus + g_11_plus + g_12_plus;
g_k_10_11_minus = g_10_plus - g_11_plus;
g_k_10_11_plus = g_10_plus + g_11_plus;
%-----%
g_k_4 = g_13_plus + g_14_plus + g_15_plus + g_16_plus + g_17_plus +
g_18_plus;
g_k_13_14_minus = g_13_plus - g_14_plus;
g_k_15_16_minus = g_15_plus - g_16_plus;
g_k_17_18_minus = g_17_plus - g_18_plus;
g_k_13_14_plus = g_13_plus + g_14_plus;
g_k_15_16_plus = g_15_plus + g_16_plus;
g_k_16_15_minus = g_16_plus - g_15_plus;
g_k_17_18_plus = g_17_plus + g_18_plus;
g_k_18_17_minus = g_18_plus - g_17_plus;
%-----%
g_k_5 = g_19_plus + g_20_plus + g_21_plus + g_22_plus + g_23_plus +
g_24_plus;
g_k_19_23_minus = g_19_plus - g_23_plus;
g_k_19_23_plus = g_19_plus + g_23_plus;
g_k_20_24 = g_20_plus + g_22_plus - g_21_plus - g_24_plus;
g_k_20_24_minus = g_20_plus + g_21_plus - g_22_plus - g_24_plus;
g_k_20_24_minus_1 = g_20_plus - g_21_plus - g_22_plus + g_24_plus;
g_k_20_24_plus = g_20_plus + g_21_plus + g_22_plus + g_24_plus;
%-----%

%-----Hamiltonian matrix-----%
n = 0;
Delta = n * eye(4);
%-----%
M_0 = [Epsilon_s 0 0 0
       0 Epsilon_p_x 0 0
       0 0 Epsilon_p_y 0
       0 0 0 Epsilon_p_z]; %On-sites energies of the 4 atomic sites
%-----%
M_0_apostrophe = [E_s_s_4*(g_k_2) E_s_x_4*(g_k_4_9) +
E_s_x_6*(g_k_6_7_minus) E_s_y_4*(g_k_4_9_minus) 0
                  -E_s_x_4*(g_k_4_9) - E_s_x_6*(g_k_6_7_minus)
E_x_x_4*(g_k_4_9_plus) + E_x_x_6*(g_k_6_7_plus)
E_x_y_4*(g_k_4_9_minus_1) 0
                  -E_s_y_4*(g_k_4_9_minus) E_x_y_4*(g_k_4_9_minus_1)
E_y_y_4*(g_k_4_9_plus) + E_y_y_6*(g_k_6_7_plus) 0
                  0 0 0 E_z_z_9*(g_k_2)];
%-----%

M_0_apostrophe_1 = [E_s_s_19*(g_k_5) E_s_x_20*(g_k_20_24)
E_s_y_19*(g_k_19_23_minus) + E_s_y_20*(g_k_20_24_minus) 0
                    -E_s_x_20*(g_k_20_24) E_x_x_19*(g_k_19_23_plus) +
E_x_x_20*(g_k_20_24_plus) E_x_y_20*(g_k_20_24_minus_1) 0
                    -E_s_y_19*(g_k_19_23_minus) - E_s_y_20*(g_k_20_24_minus)
E_x_y_20*(g_k_20_24_minus_1) E_y_y_19*(g_k_19_23_plus) +
E_y_y_20*(g_k_20_24_plus) 0
                    0 0 0 E_z_z_19*(g_k_5)];
%-----%
M_1 = [E_s_s_1*(g_k) E_s_x_3*(g_k_2_3_minus) E_s_y_1*(g_1_plus) +
E_s_y_3*(g_k_2_3_plus) E_s_z_3*(g_k)
       -E_s_x_3*(g_k_2_3_minus) E_x_x_1*(g_1_plus) +
E_x_x_3*(g_k_2_3_plus) E_x_y_2*(g_k_3_2_minus) E_x_z_3*(g_k_2_3_minus)
       -E_s_y_1*(g_1_plus) - E_s_y_3*(g_k_2_3_plus)
E_x_y_2*(g_k_3_2_minus) E_y_y_1*(g_1_plus) + E_y_y_3*(g_k_2_3_plus)
E_y_z_1*(g_1_plus) + E_y_z_3*(g_k_2_3_plus)
       -E_s_z_3*(g_k) E_x_z_3*(g_k_2_3_minus) E_y_z_1*(g_1_plus) +
E_y_z_3*(g_k_2_3_plus) E_z_z_1*(g_k)]; %NN coupling between A and B (B'
and A')
%-----%
M_1_apostrophe = [E_s_s_10*(g_k_3) E_s_x_10*(g_k_10_11_minus)
E_s_y_10*(g_k_10_11_plus) + E_s_y_12*(g_12_plus) E_s_z_10*(g_k_3)
                  -E_s_x_10*(g_k_10_11_minus) E_x_x_10*(g_k_10_11_plus) +
E_x_x_12*(g_12_plus) E_x_y_10*(g_k_10_11_minus) E_x_z_10*(g_k_10_11_minus)
                  -E_s_y_10*(g_k_10_11_plus) - E_s_y_12*(g_12_plus)
E_x_y_10*(g_k_10_11_minus) E_y_y_10*(g_k_10_11_plus) +
E_y_y_12*(g_12_plus) E_y_z_10*(g_k_10_11_plus) + E_y_z_12*(g_12_plus)
                  -E_s_z_10*(g_k_3) E_x_z_10*(g_k_10_11_minus)
E_y_z_10*(g_k_10_11_plus) + E_y_z_12*(g_12_plus) E_z_z_10*(g_k_3)];
%-----%
M_1_apostrophe_1 = [E_s_s_13*(g_k_4) E_s_x_13*(g_k_13_14_minus) +
E_s_x_15*(g_k_15_16_minus) + E_s_x_17*(g_k_17_18_minus)
E_s_y_13*(g_k_13_14_plus) + E_s_y_15*(g_k_15_16_plus) +
E_s_y_18*(g_k_17_18_plus) E_s_z_13*(g_k_4)
                  -E_s_x_13*(g_k_13_14_minus) - E_s_x_15*(g_k_15_16_minus) -
E_s_x_17*(g_k_17_18_minus) E_x_x_13*(g_k_13_14_plus) +
E_x_x_15*(g_k_15_16_plus) + E_x_x_18*(g_k_17_18_plus)
E_x_y_13*(g_k_13_14_minus) + E_x_y_16*(g_k_16_15_minus) +
E_x_y_18*(g_k_18_17_minus) E_x_z_13*(g_k_13_14_minus) +
E_x_z_15*(g_k_15_16_minus) + E_x_z_17*(g_k_17_18_minus)
                  -E_s_y_13*(g_k_13_14_plus) - E_s_y_15*(g_k_15_16_plus) -
E_s_y_18*(g_k_17_18_plus) E_x_y_13*(g_k_13_14_minus) +
E_x_y_16*(g_k_16_15_minus) + E_x_y_18*(g_k_18_17_minus)
E_y_y_13*(g_k_13_14_plus) + E_y_y_15*(g_k_15_16_plus) +
E_y_y_17*(g_k_17_18_plus) E_y_z_13*(g_k_13_14_plus) +
E_y_z_15*(g_k_15_16_plus) + E_y_z_17*(g_k_17_18_plus)
                  -E_s_z_13*(g_k_4) E_x_z_13*(g_k_13_14_minus) +
E_x_z_15*(g_k_15_16_minus) + E_x_z_17*(g_k_17_18_minus)
E_y_z_13*(g_k_13_14_plus) + E_y_z_15*(g_k_15_16_plus) +
E_y_z_17*(g_k_17_18_plus) E_z_z_13*(g_k_4)];
%-----%
M_1_trans = M_1'; %NN coupling between A' and B'
M_1_apostrophe_trans = M_1_apostrophe';
M_1_apostrophe_1_trans = M_1_apostrophe_1';
%-----%
H = [M_0 + Delta + M_0_apostrophe + M_0_apostrophe_1 M_1 +
M_1_apostrophe + M_1_apostrophe_1
     M_1_trans + M_1_apostrophe_trans + M_1_apostrophe_1_trans M_0 -
Delta + M_0_apostrophe + M_0_apostrophe_1];
%-----%
[V,D] = eig(H);
eigst = sum(D);
E_1(Nk,:) = sort(real(eigst)); %ok<SAGROW>
%-----%
end
figure;
hold on;
%-----%
X_1 = linspace(150, 250, 101);
plot(X_1, E_1 + 3.8, 'k', 'LineWidth', 1.5);
%-----%

%-----Gamma-K (-ve) direction-----%
k_x_2 = (2 * pi)/3/a; k_y = (2 * pi)/sqrt(3)/a; k_z = 0; kmax = 1; Nt = 101;
for Nk = 1:Nt
    k = [k_x_2 k_y k_z] * kmax * (Nk - 1) / (Nt - 1);
%-----%

%-----Phase factors-----%
g_1_plus = exp(1i*sum(k.*d_1));
g_2_plus = exp(1i*sum(k.*d_2));
g_3_plus = exp(1i*sum(k.*d_3));
%-----%
g_4_plus = exp(1i*sum(k.*d_4));
g_5_plus = exp(1i*sum(k.*d_5));
g_6_plus = exp(1i*sum(k.*d_6));
g_7_plus = exp(1i*sum(k.*d_7));
g_8_plus = exp(1i*sum(k.*d_8));
g_9_plus = exp(1i*sum(k.*d_9));
%-----%

```



```

g_10_plus = exp(1i*sum(k.*d_10));
g_11_plus = exp(1i*sum(k.*d_11));
g_12_plus = exp(1i*sum(k.*d_12));
%-----%
g_13_plus = exp(1i*sum(k.*d_13));
g_14_plus = exp(1i*sum(k.*d_14));
g_15_plus = exp(1i*sum(k.*d_15));
g_16_plus = exp(1i*sum(k.*d_16));
g_17_plus = exp(1i*sum(k.*d_17));
g_18_plus = exp(1i*sum(k.*d_18));
%-----%
g_19_plus = exp(1i*sum(k.*d_19));
g_20_plus = exp(1i*sum(k.*d_20));
g_21_plus = exp(1i*sum(k.*d_21));
g_22_plus = exp(1i*sum(k.*d_22));
g_23_plus = exp(1i*sum(k.*d_23));
g_24_plus = exp(1i*sum(k.*d_24));
%-----%
g_k = g_1_plus + g_2_plus + g_3_plus;
g_k_2_3_minus = g_3_plus - g_2_plus;
g_k_2_3_plus = g_3_plus + g_2_plus;
g_k_3_2_minus = g_2_plus - g_3_plus;
%-----%
g_k_2 = g_4_plus + g_5_plus + g_6_plus + g_7_plus + g_8_plus + g_9_plus;
g_k_4_9 = g_4_plus - g_5_plus + g_8_plus - g_9_plus;
g_k_6_7_minus = g_6_plus - g_7_plus;
g_k_6_7_plus = g_6_plus + g_7_plus;
g_k_4_9_minus = g_4_plus + g_5_plus - g_8_plus - g_9_plus;
g_k_4_9_plus = g_4_plus + g_5_plus + g_8_plus + g_9_plus;
g_k_4_9_minus_1 = g_4_plus - g_5_plus - g_8_plus + g_9_plus;
%-----%
g_k_3 = g_10_plus + g_11_plus + g_12_plus;
g_k_10_11_minus = g_10_plus - g_11_plus;
g_k_10_11_plus = g_10_plus + g_11_plus;
%-----%
g_k_4 = g_13_plus + g_14_plus + g_15_plus + g_16_plus + g_17_plus +
g_18_plus;
g_k_13_14_minus = g_13_plus - g_14_plus;
g_k_15_16_minus = g_15_plus - g_16_plus;
g_k_17_18_minus = g_17_plus - g_18_plus;
g_k_13_14_plus = g_13_plus + g_14_plus;
g_k_15_16_plus = g_15_plus + g_16_plus;
g_k_16_15_minus = g_16_plus - g_15_plus;
g_k_17_18_plus = g_17_plus + g_18_plus;
g_k_18_17_minus = g_18_plus - g_17_plus;
%-----%
g_k_5 = g_19_plus + g_20_plus + g_21_plus + g_22_plus + g_23_plus +
g_24_plus;
g_k_19_23_minus = g_19_plus - g_23_plus;
g_k_19_23_plus = g_19_plus + g_23_plus;
g_k_20_24 = g_20_plus + g_22_plus - g_21_plus - g_24_plus;
g_k_20_24_minus = g_20_plus + g_21_plus - g_22_plus - g_24_plus;
g_k_20_24_minus_1 = g_20_plus - g_21_plus - g_22_plus + g_24_plus;
g_k_20_24_plus = g_20_plus + g_21_plus + g_22_plus + g_24_plus;
%-----%
%-----Hamiltonian matrix-----%
n = 0;
Delta = n * eye(4);
%-----%
M_0 = [Epsilon_s 0 0 0
0 Epsilon_p_x 0 0
0 0 Epsilon_p_y 0
0 0 0 Epsilon_p_z]; %On-sites energies of the 4 atomic sites
%-----%
M_0_apostrophe = [E_s_s_4*(g_k_2) E_s_x_4*(g_k_4_9) +
E_s_x_6*(g_k_6_7_minus) E_s_y_4*(g_k_4_9_minus) 0
-E_s_x_4*(g_k_4_9) - E_s_x_6*(g_k_6_7_minus)
E_x_x_4*(g_k_4_9_plus) + E_x_x_6*(g_k_6_7_plus)
E_x_y_4*(g_k_4_9_minus_1) 0
-E_s_y_4*(g_k_4_9_minus) E_x_y_4*(g_k_4_9_minus_1)
E_y_y_4*(g_k_4_9_plus) + E_y_y_6*(g_k_6_7_plus) 0
0 0 0 E_z_z_9*(g_k_2)];
%-----%
M_0_apostrophe_1 = [E_s_s_19*(g_k_5) E_s_x_20*(g_k_20_24)
E_s_y_19*(g_k_19_23_minus) + E_s_y_20*(g_k_20_24_minus) 0
-E_s_x_20*(g_k_20_24) E_x_x_19*(g_k_19_23_plus) +
E_x_x_20*(g_k_20_24_plus) E_x_y_20*(g_k_20_24_minus_1) 0
-E_s_y_19*(g_k_19_23_minus) - E_s_y_20*(g_k_20_24_minus)
E_x_x_20*(g_k_20_24_minus_1) E_y_y_19*(g_k_19_23_plus) +
E_y_y_20*(g_k_20_24_plus) 0
0 0 0 E_z_z_19*(g_k_5)];
%-----%
M_1 = [E_s_s_1*(g_k) E_s_x_3*(g_k_2_3_minus) E_s_y_1*(g_1_plus) +
E_s_y_3*(g_k_2_3_plus) E_s_z_3*(g_k)
-E_s_x_3*(g_k_2_3_minus) E_x_x_1*(g_1_plus) +
E_x_x_3*(g_k_2_3_plus) E_x_y_2*(g_k_3_2_minus) E_x_z_3*(g_k_2_3_minus)
-E_s_y_1*(g_1_plus) - E_s_y_3*(g_k_2_3_plus)
E_x_y_2*(g_k_3_2_minus) E_y_y_1*(g_1_plus) + E_y_y_3*(g_k_2_3_plus)
E_y_z_1*(g_1_plus) + E_y_z_3*(g_k_2_3_plus)
-E_s_z_3*(g_k) E_x_z_3*(g_k_2_3_minus) E_y_z_1*(g_1_plus) +
E_y_z_3*(g_k_2_3_plus) E_z_z_1*(g_k)]; %NN coupling between A and B (B'
and A')

```

```

%-----%
M_1_apostrophe = [E_s_s_10*(g_k_3) E_s_x_10*(g_k_10_11_minus)
E_s_y_10*(g_k_10_11_plus) + E_s_y_12*(g_12_plus) E_s_z_10*(g_k_3)
-E_s_x_10*(g_k_10_11_minus) E_x_x_10*(g_k_10_11_plus) +
E_x_x_12*(g_12_plus) E_x_y_10*(g_k_10_11_minus)
E_x_x_10*(g_k_10_11_minus) - E_s_y_12*(g_12_plus)
E_x_y_10*(g_k_10_11_minus) E_y_y_10*(g_k_10_11_plus) +
E_y_y_12*(g_12_plus) E_y_z_10*(g_k_10_11_plus) + E_y_z_12*(g_12_plus)
-E_s_z_10*(g_k_3) E_x_z_10*(g_k_10_11_minus)
E_y_z_10*(g_k_10_11_plus) + E_y_z_12*(g_12_plus) E_z_z_10*(g_k_3)];
%-----%
M_1_apostrophe_1 = [E_s_s_13*(g_k_4) E_s_x_13*(g_k_13_14_minus) +
E_s_x_15*(g_k_15_16_minus) + E_s_x_17*(g_k_17_18_minus)
E_s_y_13*(g_k_13_14_plus) + E_s_y_15*(g_k_15_16_plus) +
E_s_y_18*(g_k_17_18_plus) E_s_z_13*(g_k_4)
-E_s_x_13*(g_k_13_14_minus) - E_s_x_15*(g_k_15_16_minus) -
E_s_x_17*(g_k_17_18_minus) E_x_x_13*(g_k_13_14_plus) +
E_x_x_15*(g_k_15_16_plus) + E_x_x_18*(g_k_17_18_plus)
E_x_y_13*(g_k_13_14_minus) + E_x_y_16*(g_k_16_15_minus) +
E_x_y_18*(g_k_18_17_minus) E_x_z_13*(g_k_13_14_minus) +
E_x_z_15*(g_k_15_16_minus) + E_x_z_17*(g_k_17_18_minus)
-E_s_y_13*(g_k_13_14_plus) - E_s_y_15*(g_k_15_16_plus) -
E_s_y_18*(g_k_17_18_plus) E_x_y_13*(g_k_13_14_minus) +
E_x_y_16*(g_k_16_15_minus) + E_x_y_18*(g_k_18_17_minus)
E_y_y_13*(g_k_13_14_plus) + E_y_y_15*(g_k_15_16_plus) +
E_y_y_17*(g_k_17_18_plus) E_y_z_13*(g_k_13_14_plus) +
E_y_z_15*(g_k_15_16_plus) + E_y_z_17*(g_k_17_18_plus)
-E_s_z_13*(g_k_4) E_x_z_13*(g_k_13_14_minus) +
E_x_z_15*(g_k_15_16_minus) + E_x_z_17*(g_k_17_18_minus)
E_y_z_13*(g_k_13_14_plus) + E_y_z_15*(g_k_15_16_plus) +
E_y_z_17*(g_k_17_18_plus) E_z_z_13*(g_k_4)];
%-----%
M_1_trans = M_1'; %NN coupling between A' and B'
M_1_apostrophe_trans = M_1_apostrophe';
M_1_apostrophe_1_trans = M_1_apostrophe_1';
%-----%
H = [M_0 + Delta + M_0_apostrophe + M_0_apostrophe_1 M_1 +
M_1_apostrophe + M_1_apostrophe_1
M_1_trans + M_1_apostrophe_trans + M_1_apostrophe_1_trans M_0 -
Delta + M_0_apostrophe + M_0_apostrophe_1];
%-----%
[V,D] = eig(H);
eigst = sum(D);
E_2(Nk,:) = sort(real(eigst));
%-----%
end
X_2 = linspace(150, 50, 101);
plot(X_2, E_2 + 3.8, 'k', 'LineWidth', 1.5);
%-----%
%-----M-K (-ve) direction-----%
k_x_3 = linspace(0, (2 * pi)/3/a, 101); k_y = (2 * pi)/sqrt(3)/a; k_z = 0;
for Nk = 1:length(k_x_3)
k = [k_x_3(Nk) k_y k_z];
%-----%
%-----Phase factors-----%
g_1_plus = exp(1i*sum(k.*d_1));
g_2_plus = exp(1i*sum(k.*d_2));
g_3_plus = exp(1i*sum(k.*d_3));
%-----%
g_4_plus = exp(1i*sum(k.*d_4));
g_5_plus = exp(1i*sum(k.*d_5));
g_6_plus = exp(1i*sum(k.*d_6));
g_7_plus = exp(1i*sum(k.*d_7));
g_8_plus = exp(1i*sum(k.*d_8));
g_9_plus = exp(1i*sum(k.*d_9));
%-----%
g_10_plus = exp(1i*sum(k.*d_10));
g_11_plus = exp(1i*sum(k.*d_11));
g_12_plus = exp(1i*sum(k.*d_12));
%-----%
g_13_plus = exp(1i*sum(k.*d_13));
g_14_plus = exp(1i*sum(k.*d_14));
g_15_plus = exp(1i*sum(k.*d_15));
g_16_plus = exp(1i*sum(k.*d_16));
g_17_plus = exp(1i*sum(k.*d_17));
g_18_plus = exp(1i*sum(k.*d_18));
%-----%
g_19_plus = exp(1i*sum(k.*d_19));
g_20_plus = exp(1i*sum(k.*d_20));
g_21_plus = exp(1i*sum(k.*d_21));
g_22_plus = exp(1i*sum(k.*d_22));
g_23_plus = exp(1i*sum(k.*d_23));
g_24_plus = exp(1i*sum(k.*d_24));
%-----%
g_k = g_1_plus + g_2_plus + g_3_plus;
g_k_2_3_minus = g_3_plus - g_2_plus;
g_k_2_3_plus = g_3_plus + g_2_plus;
g_k_3_2_minus = g_2_plus - g_3_plus;

```
